# 1 Adapterama II: Universal amplicon sequencing on 2 Illumina platforms (TaggiMatrix)

3  
4 Travis C. Glenn<sup>1-4</sup>, Todd W. Pierson<sup>1,§</sup>, Natalia J. Bayona-Vásquez<sup>1,4</sup>, Troy J. Kieran<sup>1</sup>, Sandra L.  
5 Hoffberg<sup>2,\*</sup>, Jesse C. Thomas IV<sup>1,α</sup>, Daniel E. Lefever<sup>5,‡</sup>, John W. Finger Jr.<sup>1,3,θ</sup>, Bei Gao<sup>1,φ</sup>,  
6 Xiaoming Bian<sup>1,ε</sup>, Swarnali Louha<sup>4</sup>, Ramya T. Kolli<sup>3,6,¥</sup>, Kerin Bentley<sup>2,#</sup>, Julie Rushmore<sup>7,γ</sup>,  
7 Kelvin Wong<sup>8,ω</sup>, Timothy I. Shaw<sup>4,8,¶</sup>, Michael J. Rothrock Jr.<sup>9</sup>, Anna M. McKee<sup>10</sup>, Tai L. Guo<sup>5</sup>,  
8 Rodney Mauricio<sup>2</sup>, Marirosa Molina<sup>8,Ω</sup>, Brian S. Cummings<sup>3,6</sup>, Lawrence H. Lash<sup>11</sup>, Kun Lu<sup>1,ψ</sup>,  
9 Gregory S. Gilbert<sup>12,13</sup>, Stephen P. Hubbell<sup>13,14</sup>, & Brant C. Faircloth<sup>15</sup>

10  
11 <sup>1</sup> Department of Environmental Health Science, University of Georgia, Athens, GA 30602, USA

12 <sup>2</sup> Department of Genetics, University of Georgia, Athens, GA 30602, USA

13 <sup>3</sup> Interdisciplinary Toxicology Program, University of Georgia, Athens, GA 30602, USA

14 <sup>4</sup> Institute of Bioinformatics, University of Georgia, Athens, GA 30602, USA

15 <sup>5</sup> Department of Veterinary Biosciences and Diagnostic Imaging, University of Georgia, Athens,  
16 GA 30602, USA

17 <sup>6</sup> Department of Pharmaceutical and Biomedical Sciences, University of Georgia, Athens, GA  
18 30602, USA

19 <sup>7</sup> School of Ecology & College of Veterinary Medicine, University of Georgia, Athens, GA  
20 30602, USA

21 <sup>8</sup> US Environmental Protection Agency, Athens, GA 30605, USA

22 <sup>9</sup> USDA-ARS U.S. National Poultry Research Center, Athens, GA 30605, USA

23 <sup>10</sup> U.S. Geological Survey, South Atlantic Water Science Center, Norcross, GA 30093, USA

24 <sup>11</sup> Department of Pharmacology, Wayne State University, Detroit, MI 48201, USA

25 <sup>12</sup> Environmental Studies Department, University of California, Santa Cruz, CA 95064, USA

26 <sup>13</sup> Smithsonian Tropical Research Institute, Balboa, Ancon, Republic of Panama

27 <sup>14</sup> Department of Ecology and Evolutionary Biology, University of California, Los Angeles, CA  
28 90095, USA

29 <sup>15</sup> Department of Biological Sciences and Museum of Natural Science, Louisiana State  
30 University, Baton Rouge, LA 70803, USA

31 <sup>§</sup> current address: Department of Ecology and Evolutionary Biology, University of Tennessee,  
32 Knoxville, TN 37996, USA

33 <sup>\*</sup> current address: Department of Ecology, Evolution, and Environmental Biology, Columbia  
34 University, New York, NY 10027, USA

35 <sup>α</sup> current address: Division of STD Prevention, Centers for Disease Control and Prevention,  
36 Atlanta, GA 30329, USA

37 <sup>‡</sup> current address: Integrative Systems Biology and Drug Discovery Institute, University of  
38 Pittsburgh, Pittsburgh, PA 15260, USA

39 <sup>θ</sup> current address: Department of Biological Sciences, Auburn University, Auburn, AL 36849,  
40 USA

41 <sup>φ</sup> current address: Department of Medicine, University of California, San Diego, CA 92093, USA

42 <sup>ε</sup> current address: Complex Carbohydrate Research Center and Department of Microbiology,  
43 University of Georgia, Athens, GA 30602, USA

44 <sup>¥</sup> current address: Epigenetics and Stem Cell Biology Laboratory, National Institute of  
45 Environmental Health Sciences, Research Triangle Park, NC 27709, USA

46 <sup>#</sup> current address: LeafWorks Inc., 125 South Main Street #150, Sebastopol, CA 95472, USA

47 <sup>γ</sup> current address: Epicenter for Disease Dynamics, One Health Institute, School of Veterinary  
48 Medicine, University of California, Davis, CA 95616, USA

49 <sup>ω</sup> current address: California Water Service, 1720 N First St, San Jose, CA 95112, USA

50 <sup>¶</sup> current address: Department of Computational Biology, St. Jude Children's Research Hospital,  
51 Memphis, TN 38105, USA

52 <sup>Ω</sup> current address: National Exposure Research Laboratory, US Environmental Protection  
53 Agency, Research Triangle Park, NC 27709, USA

54 <sup>Ψ</sup> current address: Department of Environmental Sciences and Engineering, University of North  
55 Carolina, Chapel Hill, NC 27599, USA

56

57 Corresponding Author:

58 Travis Glenn

59 Dept. of EHS, Environmental Health Science Bldg., University of Georgia, Athens, GA 30602,  
60 USA

61 Email address: [travisg@uga.edu](mailto:travisg@uga.edu)

62

## 63 **Abstract**

64 Next-generation sequencing (NGS) of amplicons is used in a wide variety of contexts. Most  
65 NGS amplicon sequencing remains overly expensive and inflexible, with library preparation  
66 strategies relying upon the fusion of locus-specific primers to full-length adapter sequences with  
67 a single identifying sequence or ligating adapters onto PCR products. In *Adapterama I*, we  
68 presented universal stubs and primers to produce thousands of unique index combinations and a  
69 modifiable system for incorporating them into Illumina libraries. Here, we describe multiple  
70 ways to use the *Adapterama* system and other approaches for amplicon sequencing on Illumina  
71 instruments. In the variant we use most frequently for large-scale projects, we fuse partial  
72 adapter sequences (TruSeq or Nextera) onto the 5' end of locus-specific PCR primers with  
73 variable-length tag sequences between the adapter and locus-specific sequences. These fusion  
74 primers can be used combinatorially to amplify samples within a 96-well plate (eight forward  
75 primers + 12 reverse primers yield  $8 \times 12 = 96$  combinations), and the resulting amplicons can be  
76 pooled. The initial PCR products then serve as template for a second round of PCR with dual-  
77 indexed iTru or iNext primers (also used combinatorially) to make full-length libraries. The  
78 resulting quadruple-indexed amplicons have diversity at most base positions and can be pooled

79 with any standard Illumina library for sequencing. The number of sequencing reads from the  
80 amplicon pools can be adjusted, facilitating deep sequencing when required or reducing  
81 sequencing costs per sample to an economically trivial amount when deep coverage is not  
82 needed. We demonstrate the utility and versatility of our approaches with results from six  
83 projects using different implementations of our protocols. Thus, we show that these methods  
84 facilitate amplicon library construction for Illumina instruments at reduced cost with increased  
85 flexibility. A simple web page to design fusion primers compatible with iTru primers is available  
86 at: <http://baddna.uga.edu/tools-taggi.html>. A fast and easy to use program to demultiplex  
87 amplicon pools with internal indexes is available at: [https://github.com/lefeverde/Mr\\_Demuxy](https://github.com/lefeverde/Mr_Demuxy).

88

## 89 **Introduction**

90 Next-generation DNA sequencing (NGS) has facilitated a wide variety of benefits in the life  
91 sciences (Ansorg, 2009; Goodwin, McPherson & McCombie, 2016), and NGS instruments have  
92 an ever-growing capacity to generate more reads per run. Substantial progress has been made in  
93 developing new, lower-cost instruments, but much less progress has been made in reducing the  
94 cost of sequencing runs (cf., Glenn, 2011 vs. Glenn, 2016). Thus, the large number of reads from  
95 a typical NGS run comes with a relatively large buy-in cost but yields an extremely low cost per  
96 read. Frustratingly, within every NGS platform, the lowest-cost sequencing kits have the highest  
97 costs per read (Glenn, 2011; 2016). This creates a fundamental challenge: how do we efficiently  
98 create and pool large numbers of samples so that we can divide the cost of high capacity NGS  
99 sequencing runs among many samples, thereby reducing the cost per sample?

100 It is well known that identifying DNA sequences (commonly called indexes, tags, or  
101 barcodes; we use the term indexes throughout) can be incorporated during sample preparation for  
102 NGS (i.e., library construction) so that multiple samples can be pooled prior to NGS, thereby  
103 allowing the sequencing costs to be divided among the samples (see Faircloth & Glenn, 2012 and  
104 references therein). When sufficient unique identifying indexes are available, many samples,  
105 including samples from multiple projects, can be pooled and sequenced on higher throughput  
106 platforms which minimizes costs for all samples in the pool.

107 In many potential NGS applications, the number of desired reads per sample is limited, so  
108 the cost of preparing samples for NGS sequencing becomes the largest component of the overall  
109 cost of collecting sequence data. Thus, it is desirable to increase the number of low-cost library  
110 preparation methods available. As the cost of library construction is reduced, projects requiring  
111 fewer DNA sequences per sample become effective to conduct using NGS (e.g., if sample  
112 preparation plus sequencing for NGS is < sample preparation plus sequencing on capillary  
113 machines, then it is economical to switch).

114

### 115 ***Previous NGS amplicon library preparation methods***

116 Amplicon library preparations for NGS have been integrating indexes for more than a decade  
117 (e.g., Binladen et al., 2007; Craig et al., 2008). Early NGS strategies consisted of conducting  
118 individual PCRs targeting different DNA regions from one sample and then pooling them

119 together. Then, full-length adapters would be ligated to each sample pool, providing sample-  
120 specific identifiers. This approach has the advantage of being economical regarding amplicon  
121 production, primer cost, and pooling of amplicons prior to adapter ligation, as well as being  
122 ecumenical because the resulting amplicons can be ligated to adapters for any sequencing  
123 platform. The downside of this first approach is that adapters must be ligated to the amplicons,  
124 which is time-consuming, expensive, and error-prone, and which can introduce errors into the  
125 resulting sequences. To avoid ligation of adapters to amplicons, most NGS amplicon sequencing  
126 strategies have subsequently relied upon the fusion of locus-specific primers to full-length  
127 adapter sequences and the addition of identical indexes to both 5' and 3' ends (e.g., Roche fusion  
128 primers; Binladen et al., 2007; Bentley et al., 2009; Bybee et al., 2011; Cronn et al., 2012;  
129 Shokralla et al., 2014). These strategies often use the whole sequencing run for amplicons only.  
130 Illumina platforms have traditionally struggled to sequence amplicons because: 1) the platform  
131 requires a diversity of bases at each base position (Mitra et al., 2015), which is easily achieved in  
132 genomic libraries but not in amplicon libraries; and 2) read-lengths are limited, making the  
133 complete sequencing of long amplicons challenging or impossible.

134 Several alternatives have been proposed to resolve the first issue (i.e., low base-  
135 diversity). Users have typically added a genomic library (e.g., the PhiX control library supplied  
136 by Illumina) to amplicon library pools to create the base-diversity needed, but this method  
137 wastes sequencing reads on non-target (PhiX) library. Second, to solve the issue of limited read-  
138 length, described above, custom sequencing primers can be used in place of the Read1 and/or  
139 Read2 sequencing primer(s) (Caporaso et al., 2011). This method allows for longer effective  
140 read-lengths by removing the read-length wasted by sequencing the primers used for  
141 amplification (e.g., 16S primer sequences), but it can be very expensive to optimize custom  
142 sequencing primers, costing hundreds of dollars for each attempt. Another alternative is to use  
143 the amplicons as template for shotgun library preparations, most often using Nextera library  
144 preparation kits (Illumina 2018a). A fourth method is to add heterogeneity spacers to the indexes  
145 in the form of one, two, three (etc.) bases before the index sequence (e.g., Cruaud et al., 2017),  
146 but because amplicons can contain repeats longer than the heterogeneity spacers, it is still  
147 possible to have regions of no diversity. Thus, all of the proposed solutions have specific  
148 limitations, and none are particularly economical for sequencing standard PCR products from a  
149 wide range of samples, as is typical in molecular ecology projects.

150

### 151 *NGS amplicon needs*

152 In general, NGS has been widely adopted to sequence complex amplicon pools where  
153 cloning would have been used previously (e.g., 16S from bacterial communities or viruses within  
154 individuals). Such amplicon pools may have extensive or no length variation. Amplicons for  
155 single loci from haploid or diploid organisms (with no length variation between alleles) are  
156 typically still sequenced via capillary electrophoresis at a cost of about \$5 USD per read. In  
157 contrast to the high cost of individual sequencing reads via capillary instruments, >50,000  
158 paired-end reads can be obtained for \$5 USD on the Illumina MiSeq. Unfortunately, MiSeq runs

159 come in units of ~\$2,000 USD for reads that total a length similar to that of capillary sequencing  
160 (Glenn, 2016; paired-end (PE) 300 reads). Thus, it would be desirable to have processes that  
161 allow users to: 1) pool samples from multiple projects on a single MiSeq run and divide costs  
162 proportionately, and 2) prepare templates (i.e., construct libraries) at costs less than or similar to  
163 those of traditional capillary sequencing.

164 Characteristics of an ideal system include: 1) use of universal Illumina sequencing  
165 primers; 2) minimizing total sample costs, ideally to be below standard capillary/Sanger  
166 sequencing; 3) minimizing time and equipment needed for library preparations; 4) minimizing  
167 buy-in (start-up) costs; 5) eliminating error-prone steps, such as adapter ligation, 6) maximizing  
168 the number of samples (e.g.,  $\geq$  thousands) that can be identified in a pool of samples run  
169 simultaneously, 7) maximizing the range of amplicons that can be added to other pools (e.g.,  
170 from  $<1\%$  to  $>90\%$ ), and 8) creating a very large universe of sample identifiers (e.g.,  $\geq$  millions)  
171 so that identifiers would not need to be shared among samples, studies, or researchers, even  
172 when coming through large sequencing centers.

173 Single-locus amplicon sequencing represents one extreme example of the needs identified  
174 above. In some scenarios, researchers may only be sequencing a single short, homogeneous  
175 amplicon where  $\geq 20x$  coverage is excessive. The cost of sequencing reagents for only 20 reads  
176 of 600 bases on an Illumina MiSeq using version 3 chemistry, which generates ~20 million  
177 reads, is  $< \$0.01$  USD (i.e., 1 millionth of the run). It is impractical to amass 1 million amplicon  
178 samples for a single run. However, a small volume of dozens or hundreds of samples can be  
179 easily added into a MiSeq run with other samples/pools that need the remaining of reads. By  
180 paying the proportional sequencing costs for such projects, the cost of constructing libraries and  
181 conducting quality control on the libraries becomes the largest component of the total cost of  
182 collecting NGS data. Having the ability to combine libraries of many different kinds of samples,  
183 each with their own identification indexes, is critical to the feasibility of this strategy. We have  
184 developed, and describe below, a system to meet most of the design characteristics enumerated  
185 above.

186 In this paper, we focus on library preparation methods for amplicons. We introduce  
187 TaggiMatrix, which is an amplicon library preparation protocol that is built upon methods  
188 developed in *Adapterama I* (Glenn et al., 2019). This general method can be optimized for  
189 various criteria, including the minimization of library preparation cost and reduction of PCR  
190 bias. Briefly, by tagging both the forward and reverse locus-specific primers with different,  
191 variable-length index sequences, and also by including indexes in the iTru or iNext primers, we  
192 create quadruple-indexed libraries with high base-diversity, enabling the use of highly  
193 combinatorial strategies to index, pool, and sequence many samples on Illumina instruments.

194

## 195 **Materials & Methods**

### 196 *Methodological objectives*

197 Our goal was to develop a protocol that would help to overcome the challenges of amplicon  
198 library preparation and fulfill the characteristics of an ideal system enumerated above. We extend  
199 the work of Faircloth & Glenn (2012) and Glenn et al. (2019) to achieve these goals.

200

### 201 ***Methodological approach***

202 Illumina libraries require four sequences (P5 + Read1 and P7 + Read2; Fig. 1), and can  
203 accommodate internal index sequences on each end, (i.e., P5 + i5 index + Read1 and P7 + i7  
204 index + Read2; Fig. 1; Illumina Sequencing Dual-Indexed Libraries on the HiSeq System User  
205 Guide; Glenn et al., 2019). The Read1 and Read2 sequences can be of two types—TruSeq or  
206 Nextera—. Just as in *Adapterama I* (Glenn et al., 2019), we have designed systems for both.

207 Our overall approach is to make amplicons with fusion primers (Fig. 2) that can use iTru  
208 or iNext primers described in *Adapterama I* (Glenn et al., 2019) to make full-length Illumina  
209 libraries (Fig. 3a; Figs. S1 and S2). The resulting libraries always contain dual-indexes in the  
210 standard indexing positions and may optionally contain additional internal indexes (Figs. 1–3;  
211 Table 1; Illumina, 2018b). These indexes are recovered through the four standard separate  
212 sequencing reactions generated by Illumina instruments when doing paired-end sequencing (Fig.  
213 3b).

214 Although iTru and iNext primers facilitate quick and low-cost additions of dual-indexed  
215 adapters, this still requires a separate PCR reaction (but, see Discussion). Thus, when hundreds  
216 of amplicons are to be sequenced, it becomes economical to use additional internal indexes  
217 (Table 1) so that amplicons can be pooled prior to the use of iTru or iNext primers (Figs. 1 and  
218 2). This approach should work with a wide variety of primers (e.g., Table 2). Such combinatorial  
219 indexing is designed to work in 96-well plate arrays but can be modified for other systems.  
220 Typically, eight indexed fusion forward primers (A–H) and 12 indexed fusion reverse primers  
221 (1–12) are designed and synthesized (File S1). Then, each DNA sample in each well of the 96-  
222 well plate can be amplified with a different forward and reverse primer combination (File S1,  
223 PCR\_Set\_up). These PCR products can be pooled and amplified using a similar combinatorial  
224 scheme with tagged universal iTru/iNext primers in the second PCR (Table 3), enabling the  
225 large-scale multiplexing of samples in one Illumina run (Table 4). Finally, because Illumina  
226 MiSeq platforms have documented issues in the quality of Read 2, particularly in GC-rich  
227 regions (Quail et al., 2012), fusion primers can be designed to swap forward and reverse primers  
228 with Read1 and Read2 fusions (e.g., R1Forward + R2Reverse, vs. R1Reverse + R2Forward;  
229 “flipped” primers) to account for this issue (Fig. 2). It is also possible to do replicate  
230 amplification with both sets of primers (regular and flipped), to significantly increase base  
231 diversity in amplicon libraries.

232

### 233 ***TaggiMatrix applied case studies***

234 We tested iTru primers designed as described above in five different experiments covering a  
235 wide range of experiments typically done in molecular ecology projects, and we tested iNext  
236 primers designed as described above in a single project (Table 4). In each experiment, we used at

237 least two sets of primers: the first set (i.e., locus-specific fusion primers) generated primary  
238 amplicons, and the second set (i.e., iTru or iNext) converted primary amplicons into full-length  
239 libraries for sequencing (Fig. 3).

240

#### 241 *iTru fusion primer experiments*

242 For TruSeq-compatible libraries, we designed and synthesized locus-specific forward fusion  
243 primers, which started on the 5' end with the Illumina TruSeq Read1 sequence (5'—  
244 ACACTCTTTCCCTACACGACGCTCTTCCGATCT—3') for forward primers or the Illumina  
245 TruSeq Read2 sequence (5'—GTGACTGGAGTTCAGACGTGTGCTCTTCCGATCT—3') for  
246 reverse primers; then included unique five nucleotide (nt) tags (Faircloth & Glenn, 2012) with  
247 variable length spacers (0–3 nt) to function as internal indexes (Table 1); and ended with locus-  
248 specific primer sequences (Fig. 2; Table 2). To assist with production of fusion primers and  
249 reduce errors, we have created and provided Excel spreadsheets (TaggiMatrix; File S1) and a  
250 web page (<http://baddna.uga.edu/tools-taggi.html>). With TaggiMatrix, users can simply input the  
251 names and sequences of the locus-specific primers, and all 22 (i.e., 2 non-indexed and 20  
252 internally indexed) fusion primers and names are generated automatically. It is important to note  
253 that secondary structures or other PCR inhibiting characteristics are not checked by these tools  
254 (see Discussion). We then used the locus-specific fusion primers in a primary PCR, followed by  
255 a clean-up step and a subsequent PCR with iTru primers from *Adapterama I*. As an example, a  
256 general protocol for 16S amplification using TaggiMatrix can be found in File S2.

257 We used this approach for five projects (Table 4), each with slight modifications. First,  
258 we used primers targeting *cytochrome-b* to characterize the source of blood meals in kissing  
259 bugs; in this project, we first amplified DNA with standard primers, then ligated a y-yoke  
260 adapter to these products, and then amplified these products in an iTru PCR (Method 1 in Table  
261 3). Second, we used primers targeting several portions of the ITS region, including “flipped”  
262 fusion primers, to identify fungal pathogens in tree tissues; in this project, we first amplified  
263 DNA with standard primers, then amplified these products with indexed fusion primers, and then  
264 amplified these products in an iTru PCR (Method 2 in Table 3). Third, we used primers targeting  
265 12S to characterize plethodontid salamander communities from environmental DNA samples; in  
266 this project, we first amplified DNA with either internally indexed or non-indexed fusion primers  
267 and then amplified these products in an iTru PCR (Methods 4 or 5 in Table 3). Fourth, we used  
268 primers targeting two regions of the cyclin-dependent kinase inhibitor *p21* promoter to compare  
269 basal DNA methylation of *p21* promoter in two types of human cells; in this project, we first  
270 amplified DNA with non-indexed fusion primers and then amplified these products in an iTru  
271 PCR (Method 4 in Table 3; Kolli et al., 2019). Fifth, we used primers targeting 16S to  
272 characterize bacterial gut microbiomes in wild cotton mice (*Peromyscus leucopus*); in this  
273 project, we first amplified DNA with internally indexed fusion primers and then amplified these  
274 products in an iTru PCR (Method 5 in Table 3; File S2). Full methods describing the sample  
275 collection, DNA extraction, library construction (including detailed descriptions of pooling  
276 schemes), and data analysis are detailed in File S3.

277

### 278 *iNext fusion primer experiments*

279 We generated libraries compatible with Nextera sequencing primers using the same approach as  
280 described above for TruSeq-compatible libraries, except that forward fusion primers started with  
281 Illumina Nextera Read1 sequence (5'—  
282 TCGTCGGCAGCGTCAGATGTGTATAAGAGACAG—3'), and reverse primers started with  
283 the Illumina Nextera Read2 sequence (5'—  
284 GTCTCGTGGGCTCGGAGATGTGTATAAGAGACAG—3'), and the second PCR used iNext  
285 primers from *Adapterama I* (Glenn et al., 2019). We have provided separate sheets within the  
286 TaggiMatrix Excel file (File S1) to facilitate the construction of iNext fusion primers.

287 We used this approach in one project. We used primers targeting one chloroplast locus,  
288 two mitochondrial loci, and two nuclear loci to perform a fine-scale population genetic analysis  
289 of the invasive vine *Wisteria*; in this project, we first amplified DNA with indexed fusion  
290 primers and then amplified these products in an iNext PCR (Method 5 in Table 3). Full methods  
291 describing the sample collection, DNA extraction, library construction (including detailed  
292 descriptions of pooling schemes), and data analysis are included in the File S3.

293

### 294 *Pooling, Sequencing, Analysis*

295 The methods used for pooling, sequencing and analysis varied among the six projects  
296 (File S3), but some general approaches were consistently employed. Amplicon library pools  
297 from each of the six projects were pooled with additional samples and sequenced at different  
298 times on Illumina MiSeq instruments. The sizes of the amplicons were determined from known  
299 sequence targets and verified by agarose gel electrophoresis and known size-standards. We  
300 quantified purified amplicon pools using Qubit (Thermo Fisher Scientific Inc, Waltham, MA).  
301 We then input the size, concentration, and number of desired reads for amplicon sub-pools and  
302 all other samples or sub-pools that would be combined together for a sequencing run into an  
303 Excel spreadsheet to calculate the amount of each sub-pool that should be used (an example file  
304 of our pooling guide can be found in File S4). We targeted total proportions ranging from <1% to  
305 44% of the MiSeq runs (Table 4). We used v.3 600 cycle kits to obtain the longest reads possible  
306 for four of the projects and v.2 500 cycle kits for two of the projects, which reduces buy-in costs  
307 when shorter reads are sufficient.

308 Following sequencing, results were returned via BaseSpace or from demultiplexing the  
309 outer indexes contained in the bcl files using Illumina software (bcl2fastq). Following  
310 demultiplexing of the outer indexes, we used Mr. Demuxy  
311 ([https://github.com/lefeverde/Mr\\_Demuxy](https://github.com/lefeverde/Mr_Demuxy); File S5) or Geneious® to demultiplex samples based  
312 on internal indexes.

313 Downstream analyses varied according to the goals of each project and further details are  
314 found in File S6. In brief, after demultiplexing, we cleaned raw sequencing data from each  
315 project by trimming primers and quality-filtering. Then, we compared sequences from project 1–  
316 4 against relevant databases to identify OTUs. For projects 5–6, we mapped reads to appropriate



317 reference sequences. For project 5, we extracted methylation profiles, whereas for project 6, we  
318 identified sequencing polymorphisms among genes and individuals. Additional details about  
319 each project are presented in Supplemental File S3.

320

## 321 **Results**

322 We used five methods that take advantage of iTru or iNext indexing primers developed in  
323 *Adapterama I* in six exemplar amplicon sequencing projects. These projects illustrate the range  
324 of methodological approaches that can be used to overcome challenges of amplicon library  
325 preparation and fulfill most of the characteristics of an ideal amplicon library preparation system.

326 In all but one project (Table 4, project 1), we designed fusion primers to generate  
327 amplicons that can be amplified by iTru5 and iTru7 (or iNext5 and iNext7) primers to create full-  
328 length Illumina TruSeq (or Nextera) libraries. The indexed fusion primers utilize 20 (i.e., 8 + 12)  
329 internal identifying sequences with an edit distance  $\geq 3$  (Table 1) to create up to 96 internally  
330 dual-indexed amplicon libraries which were used individually or pooled for additional outer  
331 indexing by iTru5 and iTru7 (or iNext5 and iNext7) primers. Sequential PCRs that start with  
332 internally indexed primers create quadruple-indexed amplicon libraries that achieve our design  
333 goals of cost reduction, facilitation of large-scale multiplexing, increased base-diversity for  
334 Illumina sequencing, and maximization of efficiency of library preparation.

335 In our project characterizing the blood meals of kissing bugs (Table 4, project 1), we  
336 obtained an average of 116,902 reads for each sample and identified a total of five unique  
337 vertebrate species as the source of the blood meals. In our project identifying fungal pathogens in  
338 tree tissues (Table 4, project 2), we obtained an average of 436,825 reads per pool (i.e., 96  
339 samples) and characterized the diverse fungal communities found in these samples. In our project  
340 characterizing plethodontid salamander communities from environmental DNA samples (Table  
341 4, project 3), we obtained an average of 163,555 reads for each PCR replicate and identified  
342 reads matching 6/7 species expected to be present in the streams. In our project comparing basal  
343 DNA methylation of *p21* (Table 4, project 4), we obtained approximately 10,000 reads per  
344 sample and detected differences in methylation of CpG sites between embryonic kidney cells and  
345 human proximal tubule cell (Kolli et al., 2019). In our project characterizing bacterial gut  
346 microbiomes (Table 4, project 5), we rarified to 15,000 quality-filtered reads per sample and  
347 identified an average of 3,847 OTUs per sample. In our project focused on the fine-scale  
348 population genetic analysis of *Wisteria* (Table 4, project 6), we obtained an average of 1,697  
349 reads per sample and discovered little evidence of population structure among samples. Variation  
350 in the average number of reads among projects reflects the intentional allocation of reads when  
351 pooling with genomic libraries for sequencing; for example, we pooled plates of libraries for the  
352 fungal pathogen project in relative quantities intended to generate approximately 4,000 reads per  
353 sample. Variation in the number of reads among samples within a given project likely reflects  
354 quantification error and variation in input DNA quantity and quality. Full results and associated  
355 figures for each project are detailed in File S3.

356 The costs associated with each method vary significantly, and which approach has the  
357 lowest cost depends on the number of samples processed (Fig. 4: note axis scales are not linear;  
358 Table 5; File S6). Methods 1 and 4 have the lowest buy-in cost, but the cost of library  
359 preparations are fixed, rather than decreasing as the number of samples increases. The constant  
360 cost per sample is due to the need for individual second round PCRs (e.g., iTru5/7). The other  
361 methods allow pooling of samples prior to second round PCR, which reduces costs. Because  
362 Method 1, with no use of fusion primers (non-indexed/indexed), has the highest library  
363 preparation costs per sample, it quickly becomes the most expensive method, more than doubling  
364 the cost of most other methods with as few as 96 samples. Method 4 remains economically  
365 reasonable for processing one or two plates of samples but becomes less reasonable as more  
366 plates of samples are used. Method 2 is never economically best, but it is sometimes necessary to  
367 achieve sufficient amplification to construct the desired libraries. Thus, Method 2 is only viable  
368 when the other methods fail. Method 3 has a moderate buy-in cost and the second-lowest cost  
369 per sample for large numbers of samples. Also, Method 3 has the lowest cost when  $\leq 11$  plates of  
370 samples will be processed, though the cost is very similar to Method 5 after  $\geq 2$  plates of samples  
371 are processed. Method 5 has the second highest buy-in costs, but the lowest costs per sample  
372 when large numbers of samples are processed. Method 5 is optimal when  $> 12$  plates of samples  
373 are processed. Because Methods 3 and 5 are similar in cost after a few plates of samples are  
374 processed, other considerations, such as workflow and personnel costs, are likely to drive  
375 decisions about the optimal method rather than the costs of reagents.

376

## 377 Discussion

378 In *Adapterama I*, we introduced a general approach to reduce the cost of genomic library  
379 preparations for Illumina instruments. Here, we made extensive use of the iNext and iTru  
380 primers described in *Adapterama I* and show that these can also be used to facilitate amplicon  
381 library construction at reduced cost with increased flexibility. As we did in *Adapterama I*, we  
382 focused mostly on iTru to simplify our presentation of the method, but iNext works identically in  
383 most situations.

384 Although we focused on Illumina, many of these approaches can be extended to other  
385 platforms following the design principles described here (e.g., use primers from sheet  
386 ITS\_10nt\_5'tags in File S1 following Method 3). For platforms that sequence individual  
387 molecules (e.g., PacBio and Oxford Nanopore), there is no advantage to variable-length indexes  
388 and negligible penalty for longer indexes, but there are significant informatic advantages to  
389 equal-length indexes. Thus, for many other platforms, it will be better to use longer indexes of  
390 equal length.

391 In general, TaggiMatrix Method 5 achieves our design goals, in that it: 1) uses the  
392 universal Illumina sequencing primers; 2) minimizes costs (as little as \$2.20 per library, i.e.  
393 Method 3 when prepping 1,248 samples in thirteen pools, Figure 4, File S6); 3) minimizes time  
394 and equipment needed for library preparations; 4) minimizes buy-in costs through the use of a  
395 limited number of fusion primers and universal iTru7 and iTru5 primers; 5) eliminates error-

396 prone ligation steps; 6) allows for > thousands of samples to be pooled and run simultaneously;  
397 7) allows users to vary amplicon representation from tiny to large fractions of a sequencing run  
398 (up to 91% has been validated for other projects, data not shown); 8) supports creating millions  
399 of samples ( $8 \times 12 \times 384 \times 384 = 14,155,776$ ) that can be tracked and multiplexed through  
400 quadruple-indexing. TaggiMatrix Method 3 shares nearly all of these advantages; per sample  
401 costs are a few cents more and ligation of a universal stub onto the amplicon pool is maintained.

402 Similar to other *Adapterama* applications, TaggiMatrix offers several methods for  
403 combinatorial and hierarchical indexing of samples (Table 3), allowing users to optimize various  
404 criteria. For example, different indexes can be used at any combination of the four index  
405 positions in the TaggiMatrix library (Fig. 3). By using inner indexes in combination, 20 ( $8 + 12$ )  
406 indexes can be used to identify 96 ( $8 \times 12$ ) samples. By using inner and outer indexes  
407 hierarchically, 40 ( $8 + 12 + 8 + 12$ ) indexes can identify 9216 ( $8 \times 12 \times 8 \times 12$ ) samples. By  
408 using two sets of iTru5 and iTru7 primers, 36,864 ( $8 \times 12 \times [8 + 8] \times [12 + 12]$ ) samples can be  
409 identified. Varying indexes at all index positions is the most economical way to tag samples,  
410 especially as the number of samples increases (Table 6). By combining a single set of 20 ( $8 + 12$ )  
411 fusion primers with the full set of 384 iTru5 and 384 iTru7 primers from *Adapterama I* (Glenn et  
412 al., 2019), a total of 14,155,776 ( $8 \times 12 \times 384 \times 384$ ) samples can be multiplexed.

413 Our methods address the issue of base diversity through the incorporation of indexes with  
414 variable-length spacers that allow for diversity at each base position. This strategy is based on  
415 independently originating ideas implemented at the Broad Institute, our lab and others, such as  
416 the system developed by Fadrosch et al. (2014) where they introduced “heterogeneity spacers” for  
417 sequencing amplicons out of phase. Longer spacers (e.g., 0–7 nt) are advantageous over shorter  
418 spacers to compensate for longer repeats in the target amplicons. Mononucleotide repeats are  
419 particularly problematic in terms of base diversity. Mononucleotide repeats of  $\geq 5$  bp will not be  
420 addressed by our short spacers (Table 1). Because Illumina reads are of set length, longer spacers  
421 decrease the total amount of useful sequence obtained for downstream analyses. Thus, there is a  
422 trade-off in how long the heterogeneity spacers should be. Here, we implement a 0–3 nt long  
423 heterogeneity spacers, although this could be easily tuned to 0–7 nt for forward primers and 0–11  
424 nt for reverse primers, to accommodate any researcher’s preferences and mononucleotide repeats  
425 known to occur in the target sequences.

426 Our approach does not deal with the limitation of read-length on Illumina platforms. For  
427 long amplicons where complete sequencing is desired, it is possible to construct shotgun libraries  
428 from the longer amplicons (e.g., using Illumina Nextera XT, Kapa Biosystems Hyper Prep Plus,  
429 NEB Ultra II FS or many other commercial kits). The methods used in *Adapterama I* may be  
430 helpful in those cases. Such libraries can take advantage of the reduced costs per read on higher  
431 capacity instruments. It is also possible to design internal locus-specific fusion primers that  
432 recover the entire desired DNA region through independent PCRs. It is important to note,  
433 however, that the recent introduction of the PacBio Sequel II along with sequencing chemistry  
434 v.6 makes circular consensus sequencing of long amplicons on PacBio an economically  
435 reasonable approach. Thus, use of the longer consistent-length indexes noted above to create

436 amplicon pools for PacBio is likely to be increasingly attractive as their platform continues to  
437 improve.

438 TaggiMatrix provides an easy way to create indexed fusion primers for convenient  
439 ordering at any oligo vendor of your choice. However, the current web page and spreadsheets do  
440 not perform quality control of the primer sequences generated. Thus, before ordering, it is  
441 important to validate the fusion primers to ensure hairpins, dimers and other secondary structures  
442 that inhibit PCR are not created. Several programs exist to validate the primers designed and  
443 these should be used before ordering. It is also generally recommended that a small number of  
444 fusion primers should be obtained and tested prior to investing large batches of long fusion  
445 primers. When deciding on the best method to use (i.e., Methods 1–5), the number of samples,  
446 reagent cost, and time available to optimize the primers should be considered (Fig. 5).

447 While developing adapters and primers to make multiple libraries that will be pooled and  
448 sequenced, it is important to determine if the primers with different indexes have biased  
449 amplification characteristics. This can be accomplished by testing all primers via quantitative  
450 PCR using a common template pool to ensure that each primer was synthesized, aliquoted, and  
451 reconstituted successfully and has similar amplification efficiency. In practice, however, it will  
452 not be economical or necessary to conduct such rigorous quality control for many projects. It is  
453 important to note that because sequencing reads are so cheap (~10,000 reads per \$1 USD for  
454 PE300 reads on a MiSeq), being off by thousands of reads per sample is less expensive than  
455 precise quantification, especially when personnel time for such quantification is considered.  
456 Thus, it will often be less expensive to subsample reads from overrepresented samples and/or  
457 simply redo the small proportion of samples that do not generate a sufficient number of reads.  
458 Another common concern with amplicon library preparation methods involving PCR is the  
459 introduction of bias due to PCR duplicates. Our method can be modified to incorporate 8N  
460 indices similar to how we addressed this issue with RADcap libraries (Hoffberg et al., 2016). It  
461 is also possible to use internal N indices of any length desired as molecular identifiers (i.e.,  
462 Jabara et al., 2011; Kou et al., 2016). These modifications, in conjunction with long-amplicon  
463 sequence on other platforms is worthy of further work.

464

## 465 **Conclusions**

466 In summary, we demonstrate how several variants of TaggiMatrix solve common challenges for  
467 amplicon sequencing on NGS platforms. Our methods can be implemented in projects from a  
468 wide array of disciplines such as microbial ecology, molecular systematics, conservation  
469 biology, population genetics, and epigenetics, and we encourage others to further develop the  
470 tools we provide for solving additional challenges posed by these applications.

471

## 472 **Acknowledgements**

473 We thank our colleagues at the Georgia Genomics and Bioinformatics Core. We thank our many  
474 colleagues at UGA and elsewhere who tested early versions of these protocols over the past five

475 years. We thank John Maerz for his help collecting environmental DNA samples. We thank  
476 Bradley Brown for his technical help on Bismark.

477

## 478 **References**

- 479 Abarenkov, K., Nilsson, R.H., Larsson, K.H., Alexander, I.J., Eberhardt, U., Erland, S., Høiland,  
480 K., Kjøller, R., Larsson, E., Pennanen, T., Sen, R., Taylor, A.F.S., Tedersoo, L., Ursing,  
481 B.J., Vrålstad, T., Liimatainen, K., Peintner, U., & Kõljalg, U. (2010). The UNITE  
482 database for molecular identification of fungi – recent updates and future perspectives.  
483 *New Phytologist*, **186**, 281-285. doi: 10.1111/j.1469-8137.2009.03160.x
- 484 Ansorge, W.J. (2009). Next-generation DNA sequencing techniques. *Nature Biotechnology*, **25**,  
485 195-203. doi: 10.1016/j.nbt.2008.12.009
- 486 Altschul, S.F., Gish, W., Miller, W., Myers, E.W., & Lipman D.J. (1990). Basic local alignment  
487 search tool. *Journal of Molecular Biology*, **215**, 403-410. doi: 10.1016/S0022-  
488 2836(05)80360-2
- 489 Bengtsson-Palme, J., Ryberg, M., Hartmann, M., Branco, S., Wang, Z., Godhe, A., ... Nilsson,  
490 R.H. (2013). Improved software detection and extraction of ITS1 and ITS2 from  
491 ribosomal ITS sequences of fungi and other eukaryotes for analysis of environmental  
492 sequencing data. *Methods in Ecology and Evolution*, **4**, 914-919. doi: 10.1111/2041-  
493 210X.12073
- 494 Bentley, G., Higuchi, R., Hoglund, B., Goodridge, D., Sayer, D., Trachtenberg, E.A., & Erlich,  
495 H.A. (2009). High-resolution, high-throughput HLA genotyping by next-generation  
496 sequencing. *Tissue Antigens*, **74**, 393-403. doi: 10.1111/j.1399-0039.2009.01345.x
- 497 Binladen, J., Gilbert, M.T.P., Bollback, J.P., Panitz, F., Bendixen, C., ... Willerslev, E. (2007).  
498 The use of coded PCR primers enables high-throughput sequencing of multiple homolog  
499 amplification products by 454 parallel sequencing. *PLoS ONE*, **2**, e197. doi:  
500 10.1371/journal.pone.0000197
- 501 Bybee, S.M., Bracken-Grissom, H., Haynes, B.D., Hermansen, R.A., Byers, R.L., Clement, M.J.,  
502 ... Crandall, K.A. (2011). Targeted Amplicon Sequencing (TAS): A scalable Next-Gen  
503 approach to multilocus, multitaxa phylogenetics. *Genome Biology and Evolution*, **3**,  
504 1312-1323. doi: 10.1093/gbe/evr106
- 505 Caporaso, J.G., Lauber, C.L., Walters, W.A., Berg-Lyons, D., Lozupone, C.A., Turnbaugh, P.J.,  
506 ... Knight, R. (2011). Global patterns of 16S rRNA diversity at a depth of millions of  
507 sequences per sample. *PNAS*, **108**, 4516-4522. doi: 10.1073/pnas.1000080107
- 508 Craig, D.W., Pearson, J.V., Szelinger, S., Sekar, A., Redman, M., Corneveaux, J.J., ...  
509 Huentelman, M.J. (2008). Identification of genetic variants using bar-coded multiplex  
510 sequencing. *Nature Methods*, **5**, 887-893. doi: 10.1038/nmeth.1251
- 511 Cronn, R., Knaus, B.J., Liston, A., Maughan, P.J., Parks, M., Syring, J.V., Udall, J. (2012).  
512 Targeted enrichment strategies for next-generation plant biology. *American Journal of*  
513 *Botany*, **99**, 291-311. doi: 10.3732/ajb.1100356

- 514 Cruaud, P., Rasplus, J.Y., Rodriguez, L.J., & Cruaud, A. (2017). High-throughput sequencing of  
515 multiple amplicons for barcoding and integrative taxonomy. *Scientific Reports*, **7**, 41948.  
516 doi: 10.1038/srep41948
- 517 DeSantis, T.Z., Hugenholtz, P., Larsen, N., Rojas, M., Brodie, E.L., Keller, K., ... Andersen, L.  
518 (2006). Greengenes, a chimera-checked 16S rRNA gene database and workbench  
519 compatible with ARB. *Applied and Environmental Microbiology*, **72**, 5069-5072. doi:  
520 10.1128/AEM.03006-05
- 521 Edgar, R.C. (2010). Search and clustering orders of magnitude faster than BLAST.  
522 *Bioinformatics*, **26**, 2460-2461. doi: 10.1093/bioinformatics/btq461
- 523 Fadrosch, D.W., Ma, B., Gajer, P., Sengamalay, N., Ott, S., Brotman, R.M., & Ravel, J. (2014).  
524 An improved dual-indexing approach for multiplexed 16S rRNA gene sequencing on the  
525 Illumina MiSeq platform. *Microbiome*, **2**:6. doi: 10.1186/2049-2618-2-6.
- 526 Faircloth, B.C., & Glenn, T.C. (2012). Not all sequence tags are created equal: Designing and  
527 validating sequence identification tags robust to indels. *PLoS ONE*, **7**, e42543. doi:  
528 10.1371/journal.pone.0042543
- 529 Glenn, T.C. (2011). Field guide to next-generation DNA sequencers. *Molecular Ecology*  
530 *Resources*, **11**, 759-769. doi: 10.1111/j.1755-0998.2011.03024.x
- 531 Glenn, T.C., Nilsen, R.A., Kieran, T.J., Sanders, J.G., Bayona-Vásquez, N.J., Finger, J.W. Jr., ...  
532 Faircloth, B.C. (2019). Adapterama I: Universal stubs and primers for 384 unique dual-  
533 indexed or 147,456 combinatorially-indexed Illumina libraries (iTru & iNext). *BioRxiv*,  
534 doi: 10.1101/049114.
- 535 Goodwin, S., McPherson, J.D., McCombie, W.R. (2016). Coming of age: ten years of next-  
536 generation sequencing technologies. *Nature Reviews, Genetics*, **17**, 333-351. doi:  
537 10.1038/nrg.2016.49
- 538 Hoffberg, S.L., Kieran, T.J., Catchen, J.M., Devault, A., Faircloth, B.C., Mauricio, R., Glenn,  
539 T.C. (2016). RADcap: Sequence capture of dual-digest RADseq libraries with  
540 identifiable duplicates and reduced missing data. *Molecular Ecology Resources* **16**, 1264-  
541 1278. doi: 10.1111/1755-0998.12566
- 542 Illumina. (2018a). Nextera XT DNA library prep kit: Reference guide. Illumina Proprietary  
543 Document # 15031942v03, February 2018.  
544 [https://support.illumina.com/content/dam/illumina-](https://support.illumina.com/content/dam/illumina-support/documents/documentation/chemistry_documentation/samplepreps_nextera_nextera-xt/nextera-xt-library-prep-reference-guide-15031942-03.pdf)  
545 [support/documents/documentation/chemistry\\_documentation/samplepreps\\_nextera/nextera-](https://support.illumina.com/content/dam/illumina-support/documents/documentation/chemistry_documentation/samplepreps_nextera_nextera-xt/nextera-xt-library-prep-reference-guide-15031942-03.pdf)  
546 [a-xt/nextera-xt-library-prep-reference-guide-15031942-03.pdf](https://support.illumina.com/content/dam/illumina-support/documents/documentation/chemistry_documentation/samplepreps_nextera_nextera-xt/nextera-xt-library-prep-reference-guide-15031942-03.pdf), accessed 2 April, 2019.
- 547 Illumina. (2018b). Indexed sequencing overview guide. Illumina Proprietary Document  
548 #15057455v04, February 2018. [http://support.illumina.com/content/dam/illumina-](http://support.illumina.com/content/dam/illumina-support/documents/documentation/system_documentation/miseq/indexed-sequencing-overview-guide-15057455-04.pdf)  
549 [support/documents/documentation/system\\_documentation/miseq/indexed-sequencing-](http://support.illumina.com/content/dam/illumina-support/documents/documentation/system_documentation/miseq/indexed-sequencing-overview-guide-15057455-04.pdf)  
550 [overview-guide-15057455-04.pdf](http://support.illumina.com/content/dam/illumina-support/documents/documentation/system_documentation/miseq/indexed-sequencing-overview-guide-15057455-04.pdf), accessed 5 October 2018.
- 551 Jabara, C.B., Jones, C.D., Roach, J., Anderson, J.A., Swanstrom, R. (2011). Accurate sampling  
552 and deep sequencing of the HIV-1 protease gene using a Primer ID. *Proc Natl Acad Sci*  
553 *USA*, **108**(50), 20166– 20171. doi: 10.1073/pnas.1110064108

- 554 Kieran, T.J., Gottdenker, N.L., Varian, C.P., Saldaña, A., Means, N., Owens, D., ... Glenn, T.  
555 (2017). Bloodmeal source characterization using Illumina sequencing in the Chagas  
556 Disease vector *Rhodnius pallescens* (Hemiptera: Reduviidae) in Panama. *Journal of*  
557 *Medical Entomology*, **54**(6), 1786-1789. doi: 10.1093/jme/tjx170
- 558 Klindworth, A., Pruesse, E., Schweer, T., Peplies, J., Quast, C., Horn, M., & Glöckne, O. (2013).  
559 Evaluation of general 16S ribosomal RNA gene PCR primers for classical and next-  
560 generation sequencing-based diversity studies. *Nucleic Acids Research*, **41**, e1. doi:  
561 10.1093/nar/gks808
- 562 Kolli, R.T., Glenn, T.C., Brown, B.T., Kaur, S.P., Barnett, L.M., Lash, L.H., Cummings, B.  
563 (2019). Bromate-induced changes in *p21* DNA methylation and histone acetylation in  
564 renal cells. *Toxicological Sciences*, **168**, 460-473. doi: 10.1093/toxsci/kfz016
- 565 Kou, R., Lam, H., Duan, H., Ye, L., Jongkam, N., Chen, W., ... Shihong, Li. (2016). Benefits  
566 and challenges with applying unique molecular identifiers in Next Generation  
567 Sequencing to detect low frequency mutations. *PLoS ONE*, **11**(1): e0146638. doi:  
568 [10.1371/journal.pone.0146638](https://doi.org/10.1371/journal.pone.0146638)
- 569 Langmead, B., & Salzberg, S.L. (2012). Fast gapped-read alignment with Bowtie 2. *Nature*  
570 *Methods*, **9**, 357-359. doi: 10.1038/nmeth.1923
- 571 Magoč, T., & Salzberg, S. (2011). FLASH: fast length adjustment of short reads to improve  
572 genome assemblies. *Bioinformatics*, **27**, 2957-2963. doi: 10.1093/bioinformatics/btr507
- 573 Meirmans, P.G., & Van Tienderen, P.H. (2004). GENOTYPE and GENODIVE: two programs  
574 for the analysis of genetic diversity of asexual organisms. *Molecular Ecology Notes*, **4**,  
575 792-794. doi: 10.1111/j.1471-8286.2004.00770.x
- 576 Mitra, A., Skrzypczak, M., Ginalski, K., & Rowicka, M. (2015). Strategies for achieving high  
577 sequencing accuracy for low diversity samples and avoiding sample bleeding using  
578 Illumina platform. *PLoS ONE*, **10**, e0120520. doi: 10.1371/journal.pone.0120520
- 579 Noireau, F., Abad-Franch, F., Valente, S.A., Dias-Lima, A., Lopes, C.M., Cunha, V., ... Jurberg,  
580 J. (2002). Trapping Triatominae in silvatic habitats. *Mem Inst Oswaldo Cruz*, **97**, 61-63.  
581 doi: 10.1590/S0074-02762002000100009
- 582 Parson, W., Pegoraro, K., Niederstätter, H., Föger, M., & Steinlechner, M. (2000). Species  
583 identification by means of the cytochrome b gene. *International Journal of Legal*  
584 *Medicine*, **114**, 23-28. doi: 10.1007/s004140000
- 585 Pierson, T.W., McKee, A.M., Spear, S.F., Maerz, J.C., Camp, C.D., & Glenn, T.C. (2016).  
586 Detection of an enigmatic plethodontid salamander using environmental DNA. *Copeia*,  
587 **2016**(1), 78-82. doi: 10.1643/CH-14-202.
- 588 Quail, M.A., Smith, M., Coupland, P., Otto, T.D., Harris, S.R., Connor T.R., Bertoni, A.,  
589 Swerdlow, H.P., & Gu, Y. (2012). A tale of three next generation sequencing platforms:  
590 comparison of Ion Torrent, Pacific Biosciences and Illumina MiSeq sequencers. *BMC*  
591 *Genomics*, **13**: 341-353. doi: 10.1186/1471-2164-13-341
- 592 Shokralla, S., Gibson, J.F., Nikbakht, H., Janzen, D.H., Hallwachs, W., & Hajibabae, M. (2014).  
593 Next-generation DNA barcoding: using next-generation sequencing to enhance and

- 594            accelerate DNA barcode capture from single specimens. *Molecular Ecology Resources*,  
595            **14**, 892-901. doi: 10.1111/1755-0998.12236
- 596 Toju, H., Tanabe, A.S., Yamamoto, S., & Sato, H. (2012). High-Coverage ITS Primers for the  
597            DNA-Based Identification of Ascomycetes and Basidiomycetes in Environmental  
598            Samples. *PLoS ONE*. **7**, e40863. doi: 10.1371/journal.pone.0040863
- 599 Trusty, J.L., Goertzen, L.R., Zipperer, W.C., & Lockaby, B.G. (2007a). Invasive Wisteria in the  
600            Southeastern United States: genetic diversity, hybridization and the role of urban centers.  
601            *Urban Ecosystems*, **10**, 379-395. doi: 10.1007/s11252-007-0030-y
- 602 Trusty, J.L., Lockaby, B.G., Zipperer, W.C., & Goertzen, L.R. (2007b). Identity of naturalised  
603            exotic Wisteria (Fabaceae) in the south-eastern United States. *Weed Research*, **47**, 479-  
604            487. doi: 10.1111/j.1365-3180.2007.00587.x
- 605 Trusty, J.L., Lockaby, B.G., Zipperer, W.C., & Goertzen, L.R. (2008). Horticulture, hybrid  
606            cultivars and exotic plant invasion: a case study of Wisteria (Fabaceae). *Botanical*  
607            *Journal of the Linnean Society*, **158**, 593-601. doi: 10.1111/j.1095-8339.2008.00908.x
- 608 White, T.J., Bruns, T., Lee, S., & Taylor, J. (1990). Amplification and direct sequencing of  
609            fungal ribosomal RNA genes for phylogenetics. In MA Innis, DH Gelfand, JJ Sninky &  
610            TJ White (Eds.), *PCR Protocols: A guide to methods and applications* (pp. 315-322) San  
611            Diego, USA: Academic Press.



**Table 1**

**Internal identifying index sequences.**

All indexes have an edit distance of  $\geq 3$ . Upper case letters are the indexes; lower case letters add length variation to facilitate sequence diversity at each base position of amplicon pools (see text for details). For Illumina MiSeq and HiSeq models  $\leq 2500$ , adenosine and cytosine are in the red detection channel, whereas guanine and thymine are in the green channel. Indexes and spacers have balanced red and green representation at each base position within each group of four indexes (i.e., count 1–4, 5–8, 9–12, 13–16, and 17–20).

| Index count | Index Label | Sequence | Length |
|-------------|-------------|----------|--------|
| 1           | A           | GGTAC    | 5      |
| 2           | B           | cAACAC   | 6      |
| 3           | C           | atCGGTT  | 7      |
| 4           | D           | tcgGTCAA | 8      |
| 5           | E           | AAGCG    | 5      |
| 6           | F           | gCCACA   | 6      |
| 7           | G           | ctGGATG  | 7      |
| 8           | H           | tgaTTGAC | 8      |
| 9           | 1           | AGGAA    | 5      |
| 10          | 2           | gAGTGG   | 6      |
| 11          | 3           | ccACGTC  | 7      |
| 12          | 4           | ttcTCAGC | 8      |
| 13          | 5           | CTAGG    | 5      |
| 14          | 6           | tGCTTA   | 6      |
| 15          | 7           | gcGAAGT  | 7      |
| 16          | 8           | aatCCTAT | 8      |
| 17          | 9           | ATCTG    | 5      |
| 18          | 10          | gAGACT   | 6      |
| 19          | 11          | cgATTCC  | 7      |
| 20          | 12          | tctCAATC | 8      |

**Table 2**

**Primer pairs used in the example projects presented.**

Project, target locus, forward and reverse primer names and sequences, as well as the sources of the primer sequences are shown.

| <b>Project</b>                     | <b>Target Locus</b> | <b>Forward Primer</b>                                                                                   | <b>Reverse Primer</b>                                                                     |
|------------------------------------|---------------------|---------------------------------------------------------------------------------------------------------|-------------------------------------------------------------------------------------------|
| Kissing Bug <sup>1</sup>           | cyt-b               | L14816: CCATCCAACATCTCAGCATGATGAAA                                                                      | H15173: CCCCTCAGAATGATATTTGTCCTCA                                                         |
| Pathogenic Fungi <sup>2,3</sup>    | ITS                 | ITS1-F_KYO2: TAGAGGAAGTAAAAGTCGTAA<br>ITS3-KYO2: AHCATGAAGAACRYAG<br>ITS1-F_KYO2: TAGAGGAAGTAAAAGTCGTAA | ITS2_KYO2: TTYRCTRCGTTCTTCATC<br>ITS4: TCCTCCGCTTATTGATATGC<br>ITS4: TCCTCCGCTTATTGATATGC |
| Salamander eDNA                    | 12S                 | Pleth_12S_F: AAAAAAGTCAGGTCAAGG                                                                         | Pleth_12S_R: GGTGACGGGCGGTGTGTG                                                           |
| Bacterial Community <sup>4,5</sup> | 16S                 | Bact-0341-b-S-17: CCTACGGGNGGCWGCAG                                                                     | S-D-Bact-0785-a-A-21: GACTACHVGGGTATCTAATCC                                               |
| Methylation <sup>6</sup>           | 16S                 | 515F: GTGCCAGCMGCCGCGGTAA                                                                               | 806R: GGACTACHVGGGTWTCTAAT                                                                |
|                                    | <i>p21-TSS</i>      | hp21-TSS F: ATAGTGTTGTGTTTTTTGGAGAGTG<br>hp21-SIE1 F:<br>TTTTTTGAGTTTTAGTTTTTTTAGTAGTGT                 | hp21-TSS R: ACAACTACTCACACCTCAACTAAC<br>hp21-SIE1 R: AACCAAATAATTTTTCAATCCC               |
| <i>Wisteria</i> <sup>7,8,9</sup>   | nr824               | w898-824F: CATGTTGCATTCAATCTTGG                                                                         | w898-824R: GCCTCCATACAAGTTAGTTG                                                           |
|                                    | nr997               | w843-997F: GAATCAACGCTGAACGTT                                                                           | w843-997AluR: GGTTCATTTATTGATGTG                                                          |
|                                    | trnL; trnL/F        | WistmLF: AGTTGACGACATTTCTTAC                                                                            | WistmLR: GGAGTGAATGGTTTGATCAATG                                                           |
|                                    | nad4                | NAD4RSF1: CTA TAGACTACTAGAGGT                                                                           | NAD4RSR1: GTTTGGCAACAAGCAAACG                                                             |
|                                    | cyt-b               | COBRSF1: CATATTGACTTTCTCTCGCC                                                                           | COBRSR1: GAATAGGATGACTCAGCGTC                                                             |

<sup>1</sup> Parson et al. 2000; <sup>2</sup> Toju *et al.* 2012; <sup>3</sup> White et al. 1990; <sup>4</sup> Klindworth et al. 2013; <sup>5</sup> Caporaso et al. 2012; <sup>6</sup> Koli et al. 2018; <sup>7</sup> Trusty et al. 2007a; <sup>8</sup> Trusty et al. 2007b; <sup>9</sup> Trusty et al. 2008

**Table 3**

**General strategies for producing and indexing amplicon libraries for Illumina sequencing.**

These examples use iTru primers, but as mentioned in the text, this can be implemented instead with iNext primers. Method 5 is illustrated below, but we are not including any dataset in the present manuscript that has implemented it (see Discussion). Note: this table does not include “flipped” primers.

| <u>Method 1</u>   | <u>Method 2</u>        | <u>Method 3</u>   | <u>Method 4</u>   | <u>Method 5</u>        |                                              |
|-------------------|------------------------|-------------------|-------------------|------------------------|----------------------------------------------|
| Standard primers  | Standard primers       | Indexed primers   | Fusion primers    | Indexed fusion primers |                                              |
| ↓                 | ↓                      | ↓                 | ↓                 | ↓                      |                                              |
| PCR               | PCR                    | PCR               | PCR               | PCR                    |                                              |
| ↓                 | ↓                      |                   |                   |                        |                                              |
|                   | Indexed fusion primers | [ Pool ]          |                   | [ Pool ]               |                                              |
| ↓                 | ↓                      |                   | ↓                 |                        |                                              |
| Y-yoke            | PCR                    | Y-yoke            |                   | ↓                      |                                              |
| ↓                 | [Pool]                 | ↓                 |                   |                        |                                              |
| iTru PCR          | ↓                      | iTru PCR          | iTru PCR          | iTru PCR               |                                              |
|                   | iTru PCR               |                   |                   |                        |                                              |
| ↓                 | ↓                      | ↓                 | ↓                 | ↓                      |                                              |
| Completed library | Completed library      | Completed library | Completed library | Completed library      |                                              |
| -                 | +                      | +                 | -                 | +                      | Base diversity in reads                      |
| -                 | +                      | +                 | -                 | +                      | Poolable to reduce library preparation costs |
| 2                 | 20                     | 20                | 2                 | 20                     | Number of primers                            |
| 192               | 193                    | 97                | 192               | 97                     | Minimum number of PCRs for 96 samples        |
| -                 | -                      | +                 | -                 | +                      | PCR bias varies among                        |
| Low               | Low                    | Med               | Med               | High                   | Optimization difficulty                      |
| Low               | High                   | Med               | Med               | High                   | Relative primer cost                         |
| High              | Med                    | Med               | Med               | Low                    | Relative library preparation cost            |

**Table 4**

**Detailed information for example projects presented to validate our approach.**

Summarized information for all example projects used to demonstrate Taggimatrix. The “Method” column refers to methods in Table 3; the “Target Reads” column cites the approximate number of reads per pool (i.e., not per individual sample) we targeted when pooling samples with other libraries. Note that these data were generated on many independent MiSeq runs. The kissing bug image is from Joseph Hughes (<https://creativecommons.org/licenses/by-nc-sa/3.0/>), and all other images are from PhyloPic 2.0 (Public Domain Dedication 1.0).

| #                    | Organisms                                                                           | Project Goal          | Target Loci                      | Library Type | Method | Pool Name      | Target Reads | Actual Reads | Summary                                             |
|----------------------|-------------------------------------------------------------------------------------|-----------------------|----------------------------------|--------------|--------|----------------|--------------|--------------|-----------------------------------------------------|
| 1                    |    | Diet analysis         | cyt-b                            | iTru         | 1      | N/A            | 100k (< 1%)  | 916k         | Identified five vertebrate sources of blood meals.  |
| 2                    |  | Fungal identification | Full-ITS1 (standard & “flipped”) | iTru         | 2      | Homokaryon     | 400k (2.7%)  | 515k         | Identified the primary fungal OTU from each culture |
|                      |                                                                                     |                       |                                  |              |        | Het.multispore | 400k (2.7%)  | 619k         |                                                     |
|                      |                                                                                     |                       |                                  |              |        | Het. Tissue    | 400k (2.7%)  | 444k         |                                                     |
|                      |                                                                                     |                       | Full-ITS2 (standard & “flipped”) | iTru         | 2      | Homokaryon     | 400k (2.7%)  | 268k         |                                                     |
|                      |                                                                                     |                       |                                  |              |        | Het.multispore | 400k (2.7%)  | 310k         |                                                     |
|                      |                                                                                     |                       |                                  |              |        | Het. Tissue    | 400k (2.7%)  | 257k         |                                                     |
| Incomplete-ITS1&ITS2 | iTru                                                                                | 2                     | Homokaryon                       | 400k (2.7%)  | 460k   |                |              |              |                                                     |

|   |                                                                                     |                     |                                                 |       |       |                   |                |      |                                                                                     |
|---|-------------------------------------------------------------------------------------|---------------------|-------------------------------------------------|-------|-------|-------------------|----------------|------|-------------------------------------------------------------------------------------|
|   |                                                                                     |                     | (standard & “flipped”)                          |       |       | Het.multispore    | 400k<br>(2.7%) | 579k |                                                                                     |
|   |                                                                                     |                     |                                                 |       |       | Het. Tissue       | 400k<br>(2.7%) | 514k |                                                                                     |
| 3 |    | Environmental DNA   | 12S                                             | iTru  | 4 & 5 | Reference samples | 10k<br>(< 1%)  | 8k   | Detected 6/7 species of salamander expected in community                            |
|   |                                                                                     |                     |                                                 |       |       | eDNA samples      | 12M<br>(48%)   | 4.4M |                                                                                     |
| 4 |    | Methylation         | <i>p21-TSS</i><br><i>SIE-1</i>                  | iTru  | 4     | N/A               | 40k<br>(0.3%)  | 121k | Compared methylation patterns between cell types                                    |
| 5 |    | Microbiome          | 16S                                             | iTru  | 5     | Ash Basin         | 1.5M<br>(6%)   | 3.8M | Detected 90,862 bacterial OTUs                                                      |
|   |                                                                                     |                     |                                                 |       |       | Pond B            | 1.5M<br>(6%)   | 2.8M |                                                                                     |
|   |                                                                                     |                     |                                                 |       |       | Tim’s Branch      | 1.5M<br>(6%)   | 0.7M |                                                                                     |
|   |                                                                                     |                     |                                                 |       |       | Upper Three Runs  | 1.5M<br>(6%)   | 2.9M |                                                                                     |
| 6 |  | Population genetics | nr824<br>nr997<br>trnL; trnL/F<br>nad4<br>cyt-b | iNext | 5     | N/A               | 150k<br>(1.3%) | 79k  | Demonstrated mixed ancestry and no population structure in an introduced population |

**Table 5**

**Oligos and iTru buy-in, and library prep costs among methods.**

Costs associated to the implementation of the different methods. In segment **a)** we present buy-in cost of oligos and iTru primers and cost per sample of library prep which consists of both, fixed and variable costs depending on pooling at early stages. Segment **b)** is the cost of library prep (no considering primers/adapters) per sample given a number of samples. Segment **c)** is the total experimental cost of primers/adapters and library prep according to the number of samples in the experiment, the first section is in term of number of samples, the second section is in terms of plates, each plate consisting of 96 samples. Cost for iTru are calculated list prices of aliquots from baddna.uga.edu. Costs for ‘oligos’ are calculated using list prices from Integrated DNA Technologies (IDT; Coralville, IA). Other costs are from listed prices from various vendors by Jan 2019. Please view File S1 and S6 for additional details on price calculations and also to review total prices of experiment given a number of samples.

| <b>a)</b>                      |  | <b>1</b>       | <b>2</b>        | <b>3</b>        | <b>4</b>      | <b>5</b>        |
|--------------------------------|--|----------------|-----------------|-----------------|---------------|-----------------|
| <b>iTru buy-in</b>             |  | <b>\$500</b>   | <b>\$500</b>    | <b>\$500</b>    | <b>\$500</b>  | <b>\$500</b>    |
| <b>Oligo buy-in</b>            |  | <b>\$103</b>   | <b>\$460</b>    | <b>\$290</b>    | <b>\$40</b>   | <b>\$445</b>    |
| <b>Library Cost per sample</b> |  | <b>\$18.86</b> | <b>variable</b> | <b>variable</b> | <b>\$4.44</b> | <b>variable</b> |
| Fixed cost                     |  | \$18.86        | \$3.12          | \$1.39          | \$4.44        | \$1.39          |
| Variable cost                  |  | -              | \$4.07          | \$17.52         | -             | \$4.07          |

  

| <b>b)</b>        |    | Library Cost per Sample for the given # of samples |        |         |        |        |
|------------------|----|----------------------------------------------------|--------|---------|--------|--------|
| <b># samples</b> |    | 1                                                  | 2      | 3       | 4      | 5      |
|                  | 1  | \$18.86                                            | \$7.19 | \$18.91 | \$4.44 | \$5.46 |
|                  | 2  | \$18.86                                            | \$5.16 | \$10.15 | \$4.44 | \$3.43 |
|                  | 8  | \$18.86                                            | \$3.63 | \$3.58  | \$4.44 | \$1.90 |
|                  | 12 | \$18.86                                            | \$3.46 | \$2.85  | \$4.44 | \$1.73 |
|                  | 24 | \$18.86                                            | \$3.29 | \$2.12  | \$4.44 | \$1.56 |
|                  | 48 | \$18.86                                            | \$3.20 | \$1.75  | \$4.44 | \$1.47 |
|                  | 96 | \$18.86                                            | \$3.16 | \$1.57  | \$4.44 | \$1.43 |

  

| <b>c)</b>        |    | Total Experiment Cost for given # of samples or plates (96 samples per plate) |            |            |            |            |
|------------------|----|-------------------------------------------------------------------------------|------------|------------|------------|------------|
| <b># samples</b> |    | 1                                                                             | 2          | 3          | 4          | 5          |
|                  | 1  | \$621.86                                                                      | \$967.19   | \$808.91   | \$544.44   | \$950.46   |
|                  | 2  | \$640.72                                                                      | \$970.31   | \$810.30   | \$548.87   | \$951.85   |
|                  | 8  | \$753.87                                                                      | \$989.03   | \$818.64   | \$575.48   | \$960.19   |
|                  | 12 | \$829.31                                                                      | \$1,001.50 | \$824.20   | \$593.22   | \$965.75   |
|                  | 24 | \$1,055.62                                                                    | \$1,038.94 | \$840.87   | \$646.45   | \$982.43   |
|                  | 48 | \$1,508.24                                                                    | \$1,113.80 | \$874.23   | \$752.90   | \$1,015.78 |
|                  | 96 | \$2,413.48                                                                    | \$1,263.53 | \$940.94   | \$965.80   | \$1,082.49 |
| <b># plates</b>  |    | 2                                                                             | 3          | 4          | 5          |            |
|                  | 2  | \$4,223.96                                                                    | \$1,567.06 | \$1,091.87 | \$1,391.60 | \$1,219.98 |
|                  | 3  | \$6,034.44                                                                    | \$1,870.59 | \$1,242.81 | \$1,817.40 | \$1,357.47 |
|                  | 4  | \$7,844.92                                                                    | \$2,174.12 | \$1,393.74 | \$2,243.20 | \$1,494.95 |
|                  | 5  | \$9,655.40                                                                    | \$2,477.66 | \$1,544.68 | \$2,669.00 | \$1,632.44 |

**Note: These will be added individually to PeerJ with each file upload. *Don't* include “Figure 1”; just add the title and description separately. Titles are in bold and descriptions are in plain font.**

Figure 1

**High throughput workflow to create and multiplex TaggiMatrix libraries**

The components of the quadrupled-indexed amplicon Libraries. A specific DNA region is amplified using fusion and tagged locus-specific primers, also known as "indexed fusion primers", to produce a fusion amplicon. Then iTru adapters are ligated using Y-yolk adapters or incorporated using limited cycle PCR with i5 and i7 indexed primers to make the complete double stranded DNA library. Internal indexes and outer i5/i7 indexes are represented as well as the set of primers used.

Figure 2

**Examples of possible primer types (Table 3), including “flipped” fusion primers**

Elements in the box are combined to form each of these various primer types, shown below the box. Standard locus-specific primer sequences are indicated by the letter “N”, in uppercase the forward primer and lowercase the reverse primer. Green and red nucleotide bases refer to unique index sequences. Blue and pink sequences are Read1 and Read 2 fusion sequences, respectively.

Figure 3

**Sequencing reads that can be obtained from dual-indexed paired-end reads.**

a) Illustration of a double-stranded DNA molecule from a full-length amplicon library (i.e., following the limited-cycle round of PCR). Horizontal arrowheads indicate the 3' ends. Labels on the double-stranded DNA indicate the function of each section, with shading to help indicate boundaries. b) Scheme of the four separate primers used for the four sequencing reactions that occur in paired-end dual-indexed sequencing and the reads that each primer produces (number in the circle). The four sequencing primers are added one at a time in the following order – Read1, Index Read1, Index Read2, and Read2. Vertical height indicates this order (top primer added first). 3A and 3B correspond to workflow A (NovaSeq™ 6000, MiSeq™, HiSeq 2500, and HiSeq 2000) and workflow B (iSeq™ 100, MiniSeq™, NextSeq™, HiSeq X, HiSeq 4000, and HiSeq 3000), respectively, of dual-indexed workflows on paired-end flow cells (Illumina 2018).

Figure 4

**Total cost of experiments across the five methods given a number of samples.**

Line plot of price of each method according to the number of samples. The starting point in the X-axis ( $x=0$ ) represents the buy-in cost of oligos.

Figure 5

## **Decision tree to select the best fitting method according to the experiment goals and budget.**

Guide of choices to drive an informed decision over the method for amplicon sequencing that may be fit the best for your lab/research/experiment goals.

Supplementary Figure S1

### **Diagram of full-length amplicon TaggiMatrix library product**

Double stranded amplicon library product after implementation of TaggiMatrix. Indication tags and indexes incorporated through the use of Fusion primers and iTru/iNext primers, respectively.

Supplementary Figure S2

### **Detailed illustration of the components on one of the possible designs (Method 5) to construct TaggiMatrix amplicon libraries**

First, locus specific fusion primers with tags are used to amplify the target DNA region. From this step pooling is possible thanks to the presence of indexes. Then library amplification with the use of iTru universal primers with indexes that allows pool labeling and incorporation of Illumina platform oligos (P5 and P7).

Supplementary File S1

### **TaggiMatrix spreadsheet**

Excel spreadsheet demonstrating the step-by-step process to create indexed fusion primers with TaggiMatrix. The first sheet (Introduction) is an introductory explanation of how the document works. The second, third, and fourth sheets (...iTru\_Fusions) are examples of the creation of indexed fusion primers for 16S, cyt-b and COI universal primers, respectively. The fifth sheet (iNext\_&\_iTru\_Primers) is a list of the universal primer sequences and prices. The sixth and seventh sheets (...Order\_Sheet) are examples of how to fill the order form to fill plates with primer sets. The eighth sheet (PCR\_Setup) indicates how to combinatorically layout the primers for a 96-well plate. The ninth, tenth, and eleventh sheets (...Tags...) list the index sequences that are incorporated to the fusion primers, their spacers, and examples.

Supplementary File S2

### **TaggiMatrix protocol for 16S amplicon library prep**

Step-by-step library construction for 16S libraries with indexed fusion primers.

Supplementary File S3

### **Supplementary methods and results for TaggiMatrix example datasets**

A detailed guide through the methods, results, and discussion of sequence analyses from TaggiMatrix data generated for each example dataset presented in this manuscript.

Supplementary File S4

### **TaggiMatrix video: what is happening inside the tube?**



This presentation demonstrates the key features of TaggiMatrix, including how the combinatorial indexing is performed in a plate.

Supplementary File S5

### **Demultiplexing Internal Indexes Using Mr. Demuxy**

Guide of how to run Mr. Demuxy to demultiplex using internal indexes amplicon data in fastq format.

Supplementary File S6

### **Price calculator among methods presented for amplicon sequencing**

Excel spreadsheet with calculations of oligos and reagents costs for library prep among the five methods presented in *Adapterama II*. Users can modify values according to their particular vendors, number of samples, and number of pools, to have an estimate of the price per sample and the price of the experiment.

Template DNA +  
Locus-specific  
Fusion Primers

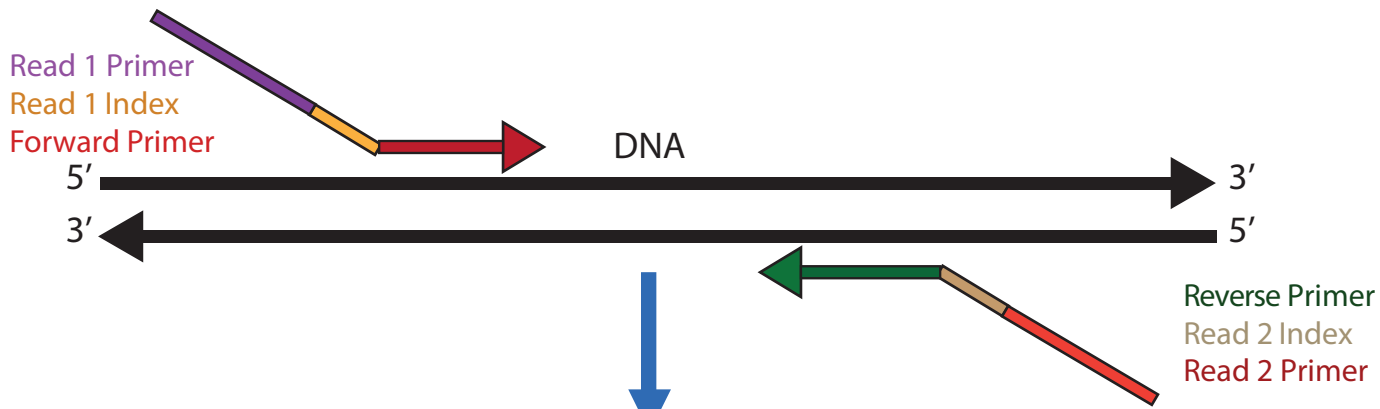

Fusion Amplicon

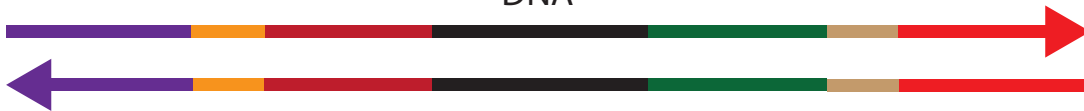

Limited cycle PCR

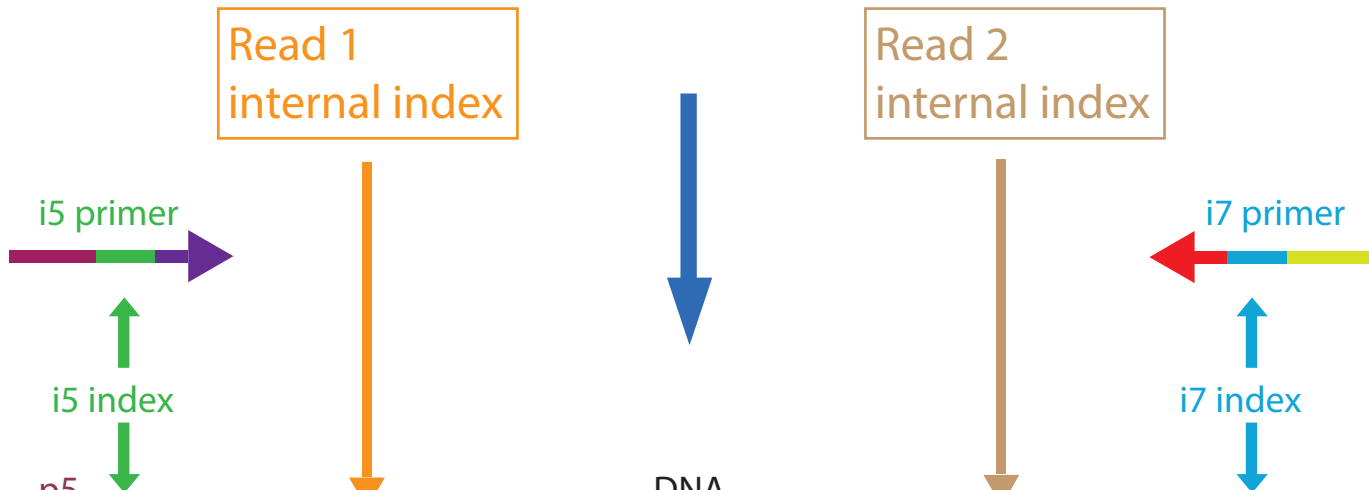

Double stranded  
DNA library

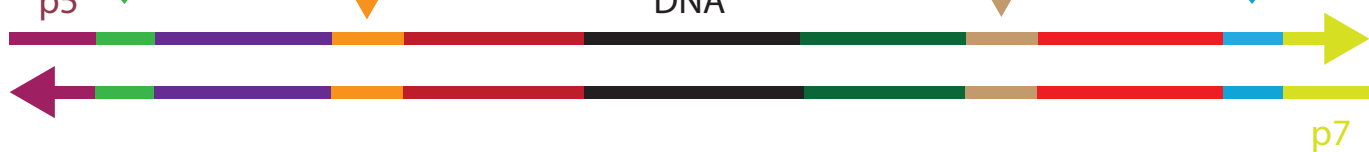

## Locus-specific primers (Standard Primers)

Forward **NNNNNNNNNNNNNNNNNNNNNN**  
Reverse **nnnnnnnnnnnnnnnnnnnnnn**

## Index Sequence

**GGTAC**  
**AGGAA**

## Universal 5' TruSeqHT

iTru\_R1\_5' **ACACTCTTTCCCTACACGACGCTCTTCCGATCT**  
iTru\_R2\_5' **GTGACTGGAGTTCAGACGTGTGCTCTTCCGATCT**

bioRxiv preprint doi: <https://doi.org/10.1101/619544>; this version posted April 26, 2019. The copyright holder for this preprint (which was not certified by peer review) is the author/funder. All rights reserved. No reuse allowed without permission.

## Standard Primers with Internal Indexes (Indexed Primers)

Forward **GGTACNNNNNNNNNNNNNNNNNNNNNN**  
Reverse **GGAAnnnnnnnnnnnnnnnnnnnnnn**

## iTru Fusion Primers without Internal Indexes (Fusion Primers)

Forward **ACACTCTTTCCCTACACGACGCTCTTCCGATCTNNNNNNNNNNNNNNNNNNNNNN**  
Reverse **GTGACTGGAGTTCAGACGTGTGCTCTTCCGATCTnnnnnnnnnnnnnnnnnnnnnn**

## iTru Fusion Primers with Internal Indexes (Indexed Fusion Primers)

Forward **ACACTCTTTCCCTACACGACGCTCTTCCGATCTGGTACNNNNNNNNNNNNNNNNNNNNNN**  
Reverse **GTGACTGGAGTTCAGACGTGTGCTCTTCCGATCTAGGAAnnnnnnnnnnnnnnnnnnnnnn**

## “Flipped” iTru Fusion Primers with Internal Indexes

Reverse **ACACTCTTTCCCTACACGACGCTCTTCCGATCTGGTACnnnnnnnnnnnnnnnnnnnnnn**  
Forward **GTGACTGGAGTTCAGACGTGTGCTCTTCCGATCTAGGAAANNNNNNNNNNNNNNNNNNNNNN**

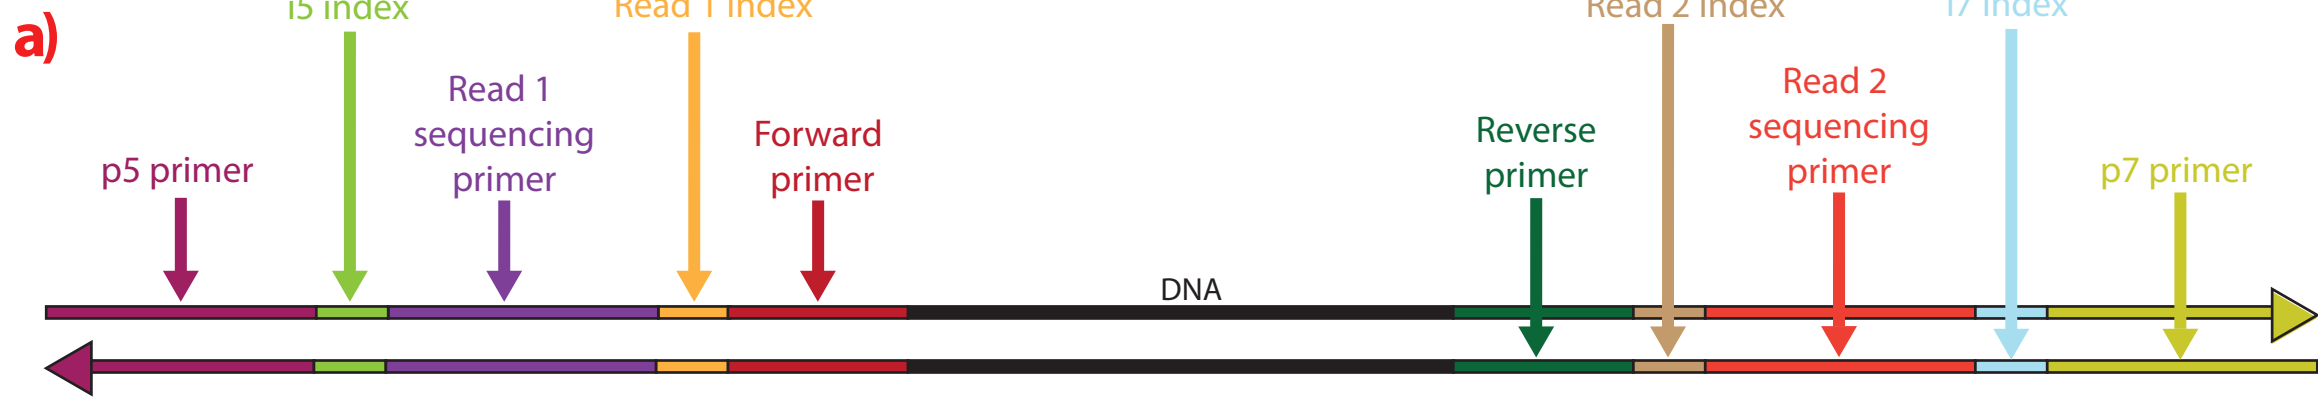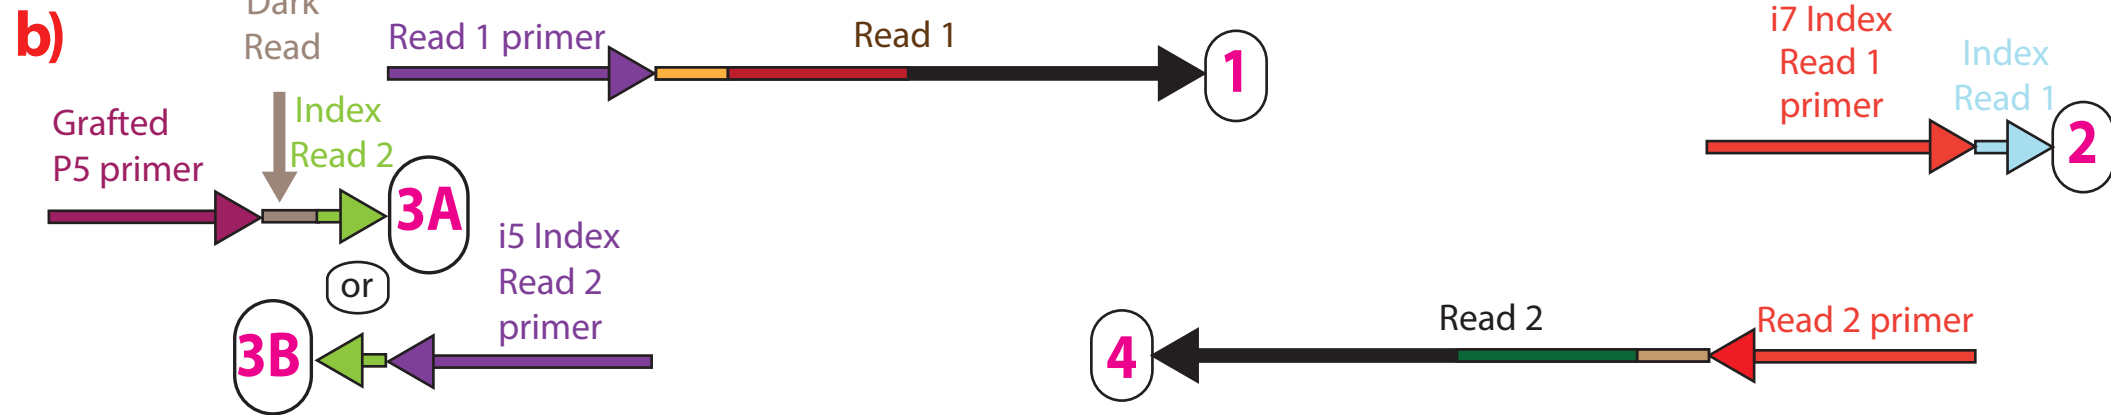

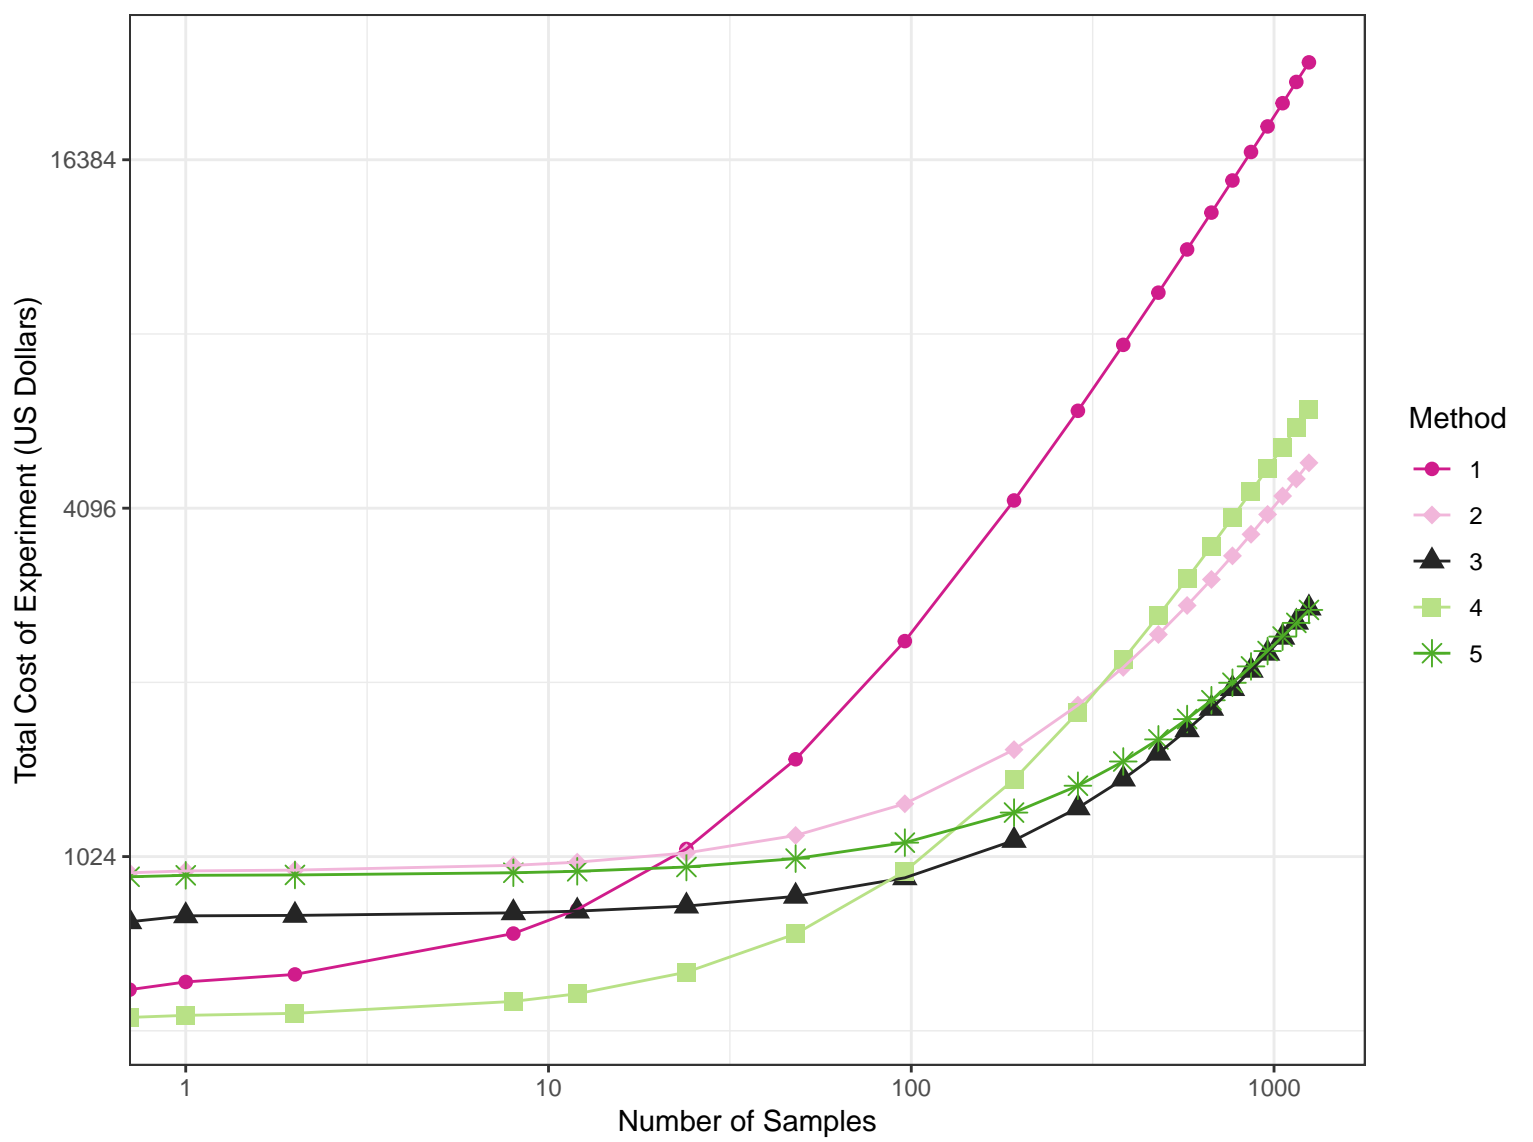

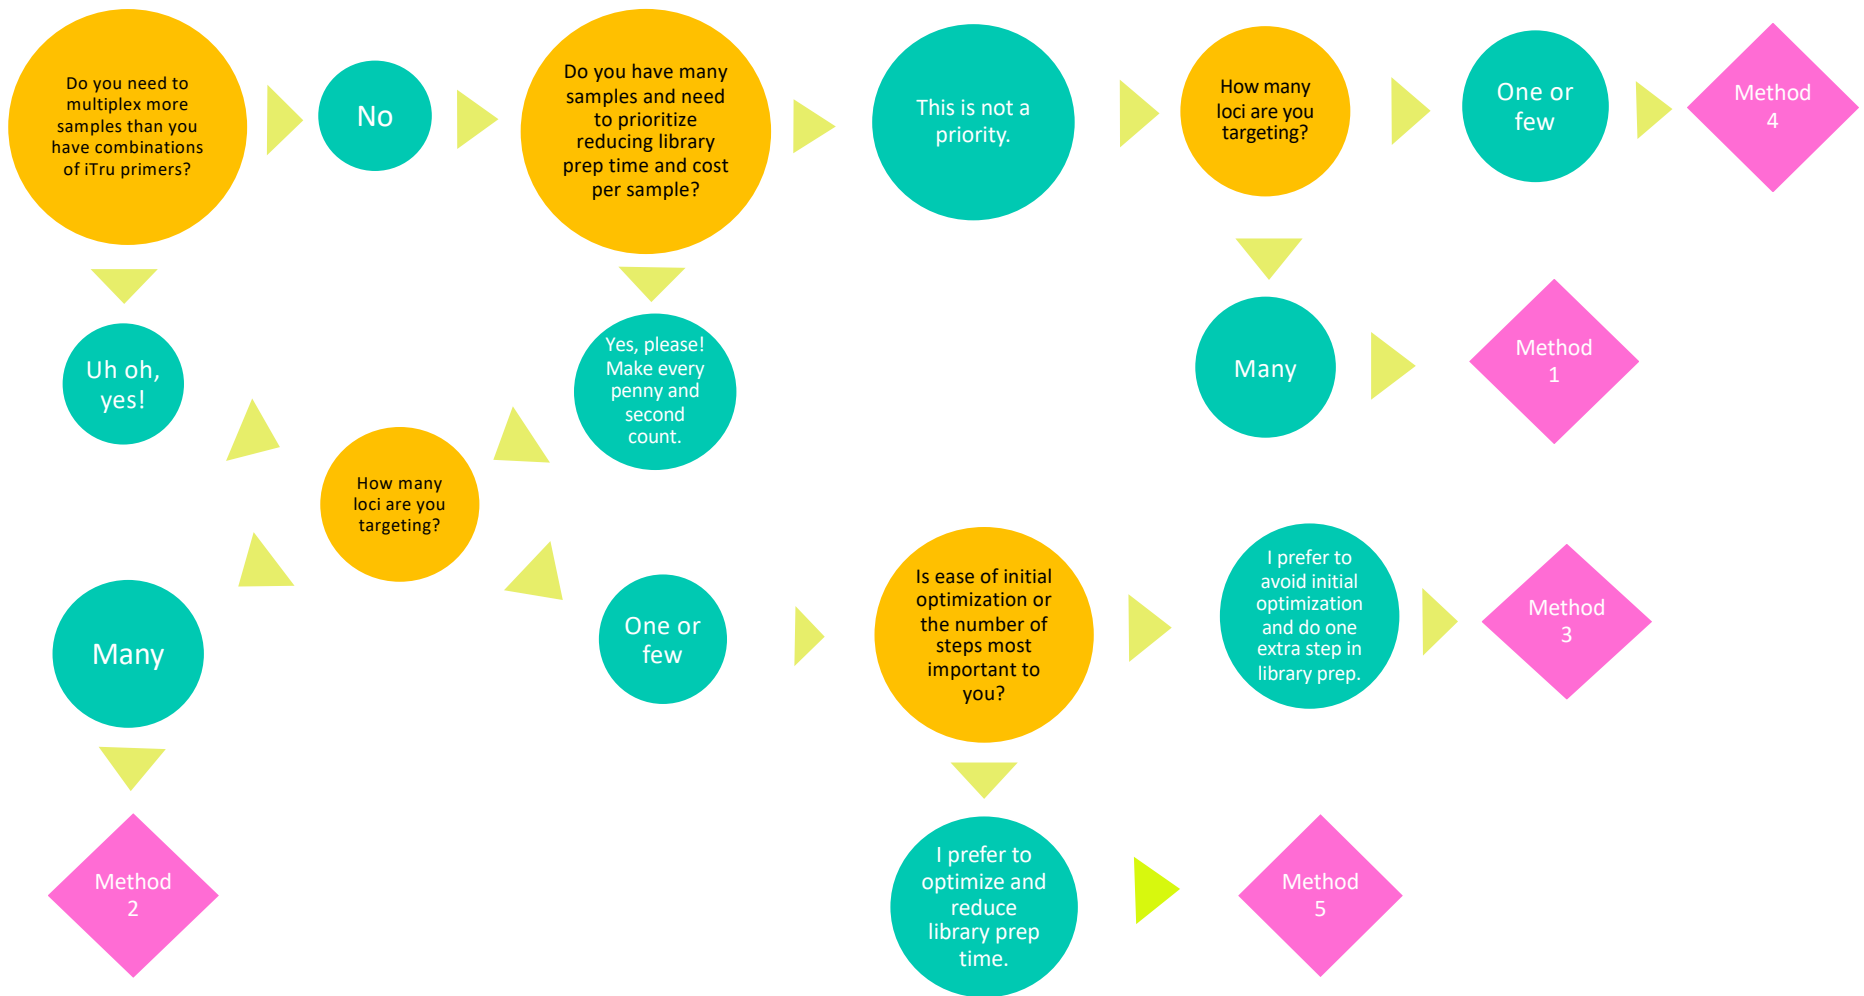

The authors declare competing interests. The EHS DNA lab provide oligonucleotide aliquots and library preparation services at cost, including some oligonucleotides and services that make use of the adapters and primers presented in this manuscript ([baddna.uga.edu](http://baddna.uga.edu)). The information we present allows all researchers to synthesize the oligonucleotides at any vendor of their choice, follow or modify the library preparation techniques we have included, and freely publish results simply with proper attribution of this paper and Illumina<sup>®</sup>™. Any use of trade, firm, or product names is for descriptive purposes only and does not imply endorsement by the U.S. Government.

This work was partially supported by: DEB-1242241, DEB-1242260, Dimensions of Biodiversity DEB-1136626, DEB-1146440, Graduate Research Fellowships DGE-0903734 and DGE-1452154, and Partnerships for International Research and Education (PIRE) OISE 0730218 from the U.S. National Science Foundation.
